# Supplementary material for: The contribution of tunnelling to the 1,5 H-shift isomerisation reaction of alkoxyl radicals
Source: Royal Society of Chemistry journal article supplement (doi:10.1039/b711429j), 2007-10-17
Supplement: b711429j.pdf [file b711429j.pdf]

## Supporting information:

### “The contribution of tunnelling to the 1,5 H-shift isomerisation reaction of alkoxy radicals”

Author: Dr. Holger Somnitz

(email: [Holger.Somnitz@uni-due.de](mailto:Holger.Somnitz@uni-due.de))

## I. Geometries of relevant molecular configurations

### I.(A). 1-butoxy geometries (XYZ-Files, coordinates in Angstroms):

#### Educt molecule:

##### MP2(full)/6-31G(d) optimised:

```
14
1-Butoxy Molekül in C1 (UMP2(Full)/6-31G(d) opt&freq) MP2=-232.210109
 1  C  -2.3366765133  -0.1153267354  -0.132672118
 2  C  -0.9030385886  -0.3498870126   0.3284914633
 3  H  -3.0110451137  -0.8823102207   0.2577977028
 4  H  -2.7038236752   0.8582902634   0.2057617509
 5  H  -2.4023160018  -0.1358009277  -1.2244810368
 6  C   0.0629478046   0.7044750228  -0.1974192333
 7  H  -0.8648631405  -0.3573064578   1.4252967091
 8  H  -0.5587671124  -1.334620651   -0.0025339218
 9  C   1.5031133589   0.4329014721   0.2114212983
10  H   0.0121963713   0.7410482356  -1.2921818228
11  H  -0.2270441978   1.6993101331   0.1652488389
12  H   2.1870629497   1.2381375551  -0.0987576044
13  H   1.5948058072   0.3692741963   1.3103419718
14  O   2.001964718   -0.778624826  -0.2506776311
```

##### MP2(fc)/6-311G(d,p) optimised:

```
14
1-Butoxy Molekül in C1 (UMP2(fc)/6-311G(d,p) opt&freq) MP2=-232.35098137783
 1  C  -2.3400996967  -0.1202982877  -0.1332233612
 2  C  -0.9048945824  -0.3475389135   0.3400688101
 3  H  -3.0159852559  -0.8830548593   0.2638402251
 4  H  -2.7069689435   0.8589848031   0.1910302018
 5  H  -2.3957543115  -0.1550315229  -1.22588243
 6  C   0.0632270813   0.7077463847  -0.1904912133
 7  H  -0.8720386776  -0.3419335857   1.4373855955
 8  H  -0.5552942681  -1.3334718733   0.0174262977
 9  C   1.510123499    0.4268215693   0.2064576402
10  H   0.0032992028   0.7462182155  -1.2851455759
11  H  -0.2196817848   1.7010528966   0.1818394942
12  H   2.1881494576   1.2438693594  -0.0845640014
13  H   1.5952039197   0.3443210914   1.305721975
14  O   2.0011166068  -0.7726673802  -0.2673153796
```

## TS\_ iso (isom. -> $\delta$ -hydroxy-butyl)

### MP2(full)/6-31G(d) optimised:

14  
1-Butoxy Isomerisierung TS (UMP2(Full)/6-31G(d) opt&freq)

|    |   |               |               |               |
|----|---|---------------|---------------|---------------|
| 1  | C | 1.2947006085  | -0.8907114131 | -0.0606453041 |
| 2  | C | -1.2821476874 | 0.2674409463  | 0.2399372194  |
| 3  | C | -0.1454699303 | 1.1169595994  | -0.3273231261 |
| 4  | C | 1.1746069322  | 0.5882690343  | 0.23309963    |
| 5  | H | 1.562031038   | -1.1229071238 | -1.0922947526 |
| 6  | H | 1.8810555017  | -1.4732544289 | 0.6510623901  |
| 7  | H | -2.242189726  | 0.5827976462  | -0.1916581957 |
| 8  | H | -1.3389438586 | 0.4043079816  | 1.3317921555  |
| 9  | H | -0.2938556561 | 2.1722431275  | -0.0721475077 |
| 10 | H | -0.1521749694 | 1.0287891865  | -1.4191770822 |
| 11 | H | 1.1986013271  | 0.7591853915  | 1.3149555182  |
| 12 | H | 2.0208515572  | 1.1385156741  | -0.1971697784 |
| 13 | O | -1.125695457  | -1.0862319149 | -0.1076860818 |
| 14 | H | 0.1200489038  | -1.2915711372 | 0.0257153919  |

### MP2(fc)/6-311G(d,p) optimised:

14  
1-Butoxy Iso (UMP2(fc)/6-311G(d,p) opt(vt)&freq) MP2=-232.32811324287

|    |   |               |               |               |
|----|---|---------------|---------------|---------------|
| 1  | C | 1.2926386145  | -0.8933821895 | -0.0602775077 |
| 2  | C | -1.2786580395 | 0.2622257208  | 0.2495772606  |
| 3  | C | -0.146484995  | 1.1142256366  | -0.3342077027 |
| 4  | C | 1.1803420296  | 0.5933655859  | 0.2271882343  |
| 5  | H | 1.5809399343  | -1.1237560927 | -1.0876733776 |
| 6  | H | 1.8694989178  | -1.4734298297 | 0.6616778007  |
| 7  | H | -2.2400932058 | 0.589579755   | -0.1709744454 |
| 8  | H | -1.3127910021 | 0.3982100732  | 1.3422540919  |
| 9  | H | -0.301302362  | 2.1702575641  | -0.0869985847 |
| 10 | H | -0.1570522754 | 1.0087389904  | -1.4249349828 |
| 11 | H | 1.2032946843  | 0.7703085365  | 1.3084435672  |
| 12 | H | 2.0219551028  | 1.1422544335  | -0.2128397168 |
| 13 | O | -1.1362376523 | -1.0830459139 | -0.1039054934 |
| 14 | H | 0.1384257671  | -1.2764046419 | 0.0086078875  |

## TS (decomp.1 -> CH<sub>2</sub>O + C<sub>3</sub>H<sub>7</sub>)

### MP2(full)/6-31G(d) optimised:

14  
1-Butoxy TS (UMP2(Full)/6-31G(d) opt&freq)

|    |   |               |               |               |
|----|---|---------------|---------------|---------------|
| 1  | C | -2.4253017639 | -0.1466173778 | -0.0860232021 |
| 2  | C | -0.9484703323 | -0.3371506059 | 0.2791268203  |
| 3  | H | -3.0211195774 | -0.9836495623 | 0.2876263861  |
| 4  | H | -2.8256064631 | 0.7737179235  | 0.3476511654  |
| 5  | H | -2.5563892985 | -0.0958398715 | -1.1699795563 |
| 6  | C | -0.1137921424 | 0.7953701389  | -0.2253752892 |
| 7  | H | -0.8483418717 | -0.4148140931 | 1.3669234362  |
| 8  | H | -0.5707185951 | -1.2699901806 | -0.1453788841 |
| 9  | C | 1.8373444644  | 0.3212422417  | 0.2596151929  |
| 10 | H | 0.0154555714  | 0.8698420066  | -1.3011294058 |
| 11 | H | -0.1933025303 | 1.7542098071  | 0.2850566701  |
| 12 | H | 2.2083184207  | 1.2630708113  | -0.1904566688 |
| 13 | H | 1.6019996528  | 0.413769448   | 1.3387684514  |
| 14 | O | 2.0113779171  | -0.7634228337 | -0.2728928408 |

MP2(fc)/6-311G(d,p) optimised:

```
14
1-Butoxy TS (UMP2(fc)/6-311G(d,p) opt&freq) MP2=-232.31598174039
 1  C   -2.4264838459  -0.1491388373  -0.0876702712
 2  C   -0.9460483401  -0.3363830315  0.2824239945
 3  H   -3.0206382159  -0.9875060206  0.2868438883
 4  H   -2.8272564729   0.7726095861  0.3439974027
 5  H   -2.5516165686  -0.1005113132  -1.1730235242
 6  C   -0.1097703164   0.7995104726  -0.2223288471
 7  H   -0.84826661    -0.4096842549  1.3709309561
 8  H   -0.5663498338  -1.2685730531  -0.1425203522
 9  C   1.8358388405    0.3174049406  0.2548252293
10  H   0.0176791423    0.8724879694  -1.2991457056
11  H   -0.1823794993   1.7545516337  0.2967698151
12  H   2.206077459     1.2600112191  -0.1988793588
13  H   1.5908220185    0.4109237854  1.3341594434
14  O   2.0075887553    -0.7615838523  -0.2728291498
```

**I.(B). 2-pentoxyl geometries (XYZ-Files, coordinates in Angstroms):**

**Educt molecule:**

MP2(full)/6-31G(d) optimised:

```
17
2-Pentoxyl Molekül in C1 (MP2(Full)/6-31G(d) opt&freq (qc)) MP2=-271.38601679624
 1  C   2.7671430202  -0.2452241595  -0.1546304191
 2  C   1.4372394035   0.3474177464  0.2972291071
 3  H   3.6075049499   0.3841569811  0.1510089913
 4  H   2.9202740345  -1.240514975  0.2735594803
 5  H   2.8000313676  -0.3418367011  -1.2439302761
 6  C   0.247290835    -0.5108203475  -0.1124024018
 7  H   1.4380500388   0.464184569   1.3884557209
 8  H   1.3086418297   1.3489240602  -0.1234146652
 9  C  -1.0983284592    0.0992948872  0.2771347514
10  H   0.2510331117  -0.6585912854  -1.2002095498
11  H   0.3277576707  -1.5080209219  0.3390496456
12  C  -2.2916494669  -0.7979203999  -0.0355276048
13  H  -1.0891731907   0.3200799523  1.3622565384
14  O  -1.2715858499    1.3667162038  -0.2774554861
15  H  -3.2199176429  -0.3080155498  0.2649357621
16  H  -2.3353681884  -0.9961841405  -1.1097716215
17  H  -2.2063191772  -1.7543979795  0.4868832663
```

**TS\_ iso (isom. ->  $\delta$ -hydroxy-pentyl)**

MP2(full)/6-31G(d) optimised:

```
2-Pentoxyl Iso TS in C1 (MP2(Full)/6-31G(d) opt&freq) MP2=-271.35938796941
 1  C  -1.9163542071  -0.6536492055  0.1419216814
 2  C  -1.5327528813   0.7700562402  -0.1973476818
 3  H  -2.1474273176  -0.8161410095  1.1955357892
 4  H  -2.6572065768  -1.1174812306  -0.5106875802
 5  H  -0.8549504558  -1.2726595343  -0.0173449174
 6  C  -0.0987399231   1.0354096771  0.257277478
 7  H  -1.6022262781   0.9299464265  -1.2789012702
 8  H  -2.2227760073   1.4803042339  0.2755462592
```

|    |   |               |               |               |
|----|---|---------------|---------------|---------------|
| 9  | O | 0.4193253403  | -1.308245482  | 0.0218503615  |
| 10 | C | 0.8253106847  | -0.0135910412 | -0.3631951379 |
| 11 | H | 0.2305242586  | 2.0416719824  | -0.026963275  |
| 12 | H | -0.0274400675 | 0.952747247   | 1.3485849649  |
| 13 | H | 0.7857360649  | 0.0934568801  | -1.4615403728 |
| 14 | C | 2.2679538008  | 0.137312323   | 0.102313372   |
| 15 | H | 2.314327781   | 0.0522188085  | 1.1904240035  |
| 16 | H | 2.6615238298  | 1.1124764089  | -0.1997090168 |
| 17 | H | 2.8928072032  | -0.643804318  | -0.3355657469 |

### TS (decomp.1 -> CH<sub>3</sub>CHO + C<sub>3</sub>H<sub>7</sub>)

MP2(full)/6-31G(d) optimised:

|    |                                                                          |               |               |               |
|----|--------------------------------------------------------------------------|---------------|---------------|---------------|
| 17 | 2-Pentoxo TS1 in C1 (MP2 (Full) /6-31G(d) opt&freq) MP2=-271.35264290527 |               |               |               |
| 1  | C                                                                        | 2.8638002877  | -0.2161747169 | -0.110355922  |
| 2  | C                                                                        | 1.4803139714  | 0.3545965463  | 0.2204337363  |
| 3  | H                                                                        | 3.6445589845  | 0.5089951807  | 0.1345808741  |
| 4  | H                                                                        | 3.0624041121  | -1.1301911664 | 0.4560756859  |
| 5  | H                                                                        | 2.9453289837  | -0.4529116848 | -1.1744896724 |
| 6  | C                                                                        | 0.3976031134  | -0.6215072002 | -0.1118829722 |
| 7  | H                                                                        | 1.4346766608  | 0.6082714907  | 1.2849417604  |
| 8  | H                                                                        | 1.3040645532  | 1.2773156198  | -0.3358029036 |
| 9  | C                                                                        | -1.3692349037 | 0.2720880057  | 0.3460040178  |
| 10 | H                                                                        | 0.2097098528  | -0.8011680984 | -1.167026906  |
| 11 | H                                                                        | 0.3183783193  | -1.511769584  | 0.510594649   |
| 12 | C                                                                        | -2.3489362617 | -0.8106302718 | -0.0648691984 |
| 13 | H                                                                        | -1.0869755828 | 0.2407750474  | 1.4220665702  |
| 14 | O                                                                        | -1.2670466977 | 1.3194413145  | -0.2895647218 |
| 15 | H                                                                        | -3.3409528171 | -0.4924116557 | 0.2726419044  |
| 16 | H                                                                        | -2.370269822  | -0.8941031685 | -1.152350001  |
| 17 | H                                                                        | -2.1258269053 | -1.7785666755 | 0.3893078452  |

### TS (decomp.2 -> C<sub>3</sub>H<sub>7</sub>CHO + CH<sub>3</sub>)

MP2(full)/6-31G(d) optimised:

|    |                                                                          |               |               |               |
|----|--------------------------------------------------------------------------|---------------|---------------|---------------|
| 17 | 2-Pentoxo TS2 in C1 (MP2 (Full) /6-31G(d) opt&freq) MP2=-271.34771231054 |               |               |               |
| 1  | H                                                                        | 3.6781354527  | 0.2539544668  | 0.0737672221  |
| 2  | C                                                                        | 2.7943484613  | -0.3499693206 | -0.1492369303 |
| 3  | C                                                                        | 1.5151218859  | 0.3830596628  | 0.2371190735  |
| 4  | H                                                                        | 2.8038139559  | -0.5776489381 | -1.218979993  |
| 5  | H                                                                        | 2.8860458468  | -1.2941169836 | 0.3958013215  |
| 6  | C                                                                        | 0.2601410758  | -0.4366684169 | -0.0754828596 |
| 7  | H                                                                        | 1.5366128657  | 0.6248113547  | 1.3069549015  |
| 8  | H                                                                        | 1.4422850138  | 1.3339918336  | -0.2989656282 |
| 9  | C                                                                        | -0.9562947578 | 0.3673362603  | 0.3439028537  |
| 10 | H                                                                        | 0.19962402    | -0.6241067056 | -1.1519907878 |
| 11 | H                                                                        | 0.2975504783  | -1.3988738384 | 0.4480850591  |
| 12 | C                                                                        | -2.4579866971 | -0.960435403  | -0.0521566083 |
| 13 | H                                                                        | -1.1897215829 | 0.3032872124  | 1.4306960746  |
| 14 | O                                                                        | -1.3442383881 | 1.3288300243  | -0.3150531449 |
| 15 | H                                                                        | -3.3210414687 | -0.3928747525 | 0.2690149872  |
| 16 | H                                                                        | -2.3382222572 | -1.0722420988 | -1.1217200863 |
| 17 | H                                                                        | -2.173155028  | -1.806758441  | 0.5628889143  |

## II. Vibrational Frequencies (unscaled)

| 1-butoxyl            |         |                      |                      |         |                      | 2-pentoxyl           |                      |                      |                      |
|----------------------|---------|----------------------|----------------------|---------|----------------------|----------------------|----------------------|----------------------|----------------------|
| MP2(fu)/6-31G(d)     |         |                      | MP2(fc)/6-311G(d,p)  |         |                      | MP2(fu)/6-31G(d)     |                      |                      |                      |
| mol                  | isom.   | dec.1                | mol*                 | isom.*  | dec.1*               | mol                  | isom.                | dec.1                | dec.2                |
| <sup>a</sup> (94.7)  | -2267.5 | -589.4               | <sup>a</sup> (87.0)  | -2033.3 | -566.1               | <sup>d</sup> (83.1)  | -2256.7              | -655.7               | -738.5               |
| <sup>b</sup> (152.1) | 172.4   | <sup>a</sup> (72.1)  | <sup>b</sup> (151.5) | 169.3   | <sup>a</sup> (61.6)  | <sup>e</sup> (118.7) | 122.0                | <sup>d</sup> (67.1)  | <sup>e</sup> (86.2)  |
| 253.1                | 325.4   | <sup>b</sup> (118.8) | 244.0                | 323.1   | <sup>b</sup> (118.9) | 179.1                | <sup>f</sup> (248.5) | <sup>e</sup> (92.4)  | <sup>d</sup> (102.3) |
| <sup>c</sup> (263.0) | 406.9   | 180.8                | <sup>c</sup> (251.3) | 400.3   | 175.6                | <sup>f</sup> (237.7) | 263.6                | 148.9                | 146.0                |
| 352.6                | 463.5   | <sup>c</sup> (259.4) | 345.5                | 458.0   | <sup>c</sup> (252.2) | <sup>g</sup> (261.6) | 305.0                | <sup>f</sup> (209.9) | <sup>f</sup> (171.8) |
| 519.3                | 511.5   | 337.3                | 521.7                | 502.9   | 334.5                | 327.1                | 398.0                | <sup>g</sup> (259.0) | <sup>g</sup> (259.1) |
| 564.2                | 685.2   | 392.9                | 604.5                | 708.0   | 386.2                | 382.0                | 465.6                | 267.0                | 265.3                |
| 776.5                | 853.0   | 645.1                | 767.5                | 838.0   | 633.0                | 452.7                | 497.8                | 344.7                | 356.6                |
| 884.1                | 882.9   | 712.4                | 868.8                | 871.0   | 683.4                | 484.7                | 501.4                | 419.8                | 432.2                |
| 906.4                | 928.3   | 787.2                | 895.4                | 923.7   | 771.3                | 768.0                | 718.2                | 513.8                | 537.5                |
| 993.0                | 976.1   | 938.7                | 979.0                | 962.0   | 918.4                | 865.7                | 831.5                | 693.7                | 661.3                |
| 1056.9               | 992.3   | 946.4                | 1047.6               | 978.3   | 928.3                | 893.0                | 889.9                | 789.0                | 682.6                |
| 1090.4               | 1071.9  | 953.0                | 1077.5               | 1059.9  | 935.2                | 936.4                | 929.8                | 892.4                | 776.9                |
| 1121.0               | 1114.1  | 1076.8               | 1107.0               | 1099.2  | 1061.2               | 990.5                | 936.3                | 943.3                | 905.7                |
| 1171.4               | 1165.8  | 1157.7               | 1147.9               | 1146.1  | 1139.0               | 996.8                | 986.5                | 949.3                | 922.2                |
| 1251.8               | 1206.9  | 1215.4               | 1227.8               | 1188.3  | 1205.2               | 1089.1               | 1031.0               | 956.2                | 956.7                |
| 1305.8               | 1228.5  | 1262.0               | 1275.4               | 1214.9  | 1233.0               | 1105.4               | 1086.1               | 975.1                | 1016.1               |
| 1365.8               | 1281.0  | 1301.0               | 1334.3               | 1261.6  | 1293.2               | 1111.2               | 1110.4               | 1067.8               | 1087.0               |
| 1370.3               | 1305.8  | 1356.5               | 1343.5               | 1285.0  | 1332.0               | 1171.7               | 1173.8               | 1129.9               | 1100.4               |
| 1420.4               | 1332.6  | 1389.9               | 1387.5               | 1328.0  | 1357.4               | 1228.2               | 1183.1               | 1161.7               | 1154.9               |
| 1452.4               | 1386.5  | 1465.9               | 1420.6               | 1356.1  | 1421.5               | 1276.7               | 1217.6               | 1183.5               | 1200.4               |
| 1473.8               | 1411.3  | 1531.6               | 1425.6               | 1383.3  | 1493.8               | 1296.1               | 1281.6               | 1262.5               | 1300.1               |
| 1477.8               | 1422.7  | 1555.6               | 1430.9               | 1405.6  | 1510.1               | 1343.3               | 1290.3               | 1353.0               | 1330.3               |
| 1546.2               | 1516.4  | 1563.5               | 1498.4               | 1477.3  | 1518.9               | 1355.8               | 1335.4               | 1387.6               | 1367.6               |
| 1560.5               | 1541.0  | 1568.5               | 1514.3               | 1492.7  | 1527.2               | 1378.8               | 1366.5               | 1430.6               | 1425.4               |
| 1565.9               | 1548.5  | 1572.7               | 1521.2               | 1505.6  | 1550.0               | 1439.2               | 1406.3               | 1449.0               | 1437.9               |
| 1574.1               | 1559.9  | 1754.9               | 1528.1               | 1516.3  | 1742.9               | 1458.4               | 1413.1               | 1466.0               | 1472.3               |
| 3022.1               | 1622.9  | 2957.8               | 2993.9               | 1612.7  | 2912.7               | 1473.5               | 1428.8               | 1526.4               | 1482.3               |
| 3078.7               | 3040.6  | 3018.5               | 3053.1               | 3016.3  | 2968.1               | 1544.5               | 1452.3               | 1538.4               | 1499.6               |
| 3092.7               | 3095.5  | 3107.9               | 3066.5               | 3071.4  | 3074.8               | 1553.2               | 1516.2               | 1541.6               | 1534.8               |
| 3098.5               | 3102.6  | 3121.3               | 3069.4               | 3075.2  | 3094.6               | 1560.2               | 1537.3               | 1555.0               | 1558.4               |
| 3102.9               | 3114.1  | 3183.4               | 3073.0               | 3087.5  | 3151.2               | 1561.0               | 1546.9               | 1563.7               | 1564.6               |
| 3143.6               | 3149.1  | 3187.5               | 3116.3               | 3122.4  | 3155.3               | 1565.9               | 1553.2               | 1570.5               | 1570.9               |
| 3163.0               | 3161.0  | 3200.8               | 3135.0               | 3128.1  | 3168.3               | 1574.2               | 1563.2               | 1717.1               | 1698.4               |
| 3191.5               | 3171.8  | 3205.3               | 3159.5               | 3147.5  | 3174.5               | 2994.7               | 1622.3               | 2930.4               | 2928.4               |
| 3194.2               | 3247.8  | 3296.6               | 3162.4               | 3211.9  | 3264.4               | 3086.0               | 3019.5               | 3106.4               | 3100.4               |
|                      |         |                      |                      |         |                      | 3098.5               | 3094.6               | 3109.8               | 3103.4               |
|                      |         |                      |                      |         |                      | 3101.9               | 3100.7               | 3121.5               | 3108.0               |
|                      |         |                      |                      |         |                      | 3112.2               | 3110.1               | 3180.4               | 3160.9               |
|                      |         |                      |                      |         |                      | 3138.2               | 3147.5               | 3188.1               | 3177.8               |
|                      |         |                      |                      |         |                      | 3166.3               | 3159.8               | 3198.7               | 3183.0               |
|                      |         |                      |                      |         |                      | 3191.3               | 3163.1               | 3199.4               | 3194.7               |
|                      |         |                      |                      |         |                      | 3192.9               | 3203.6               | 3205.5               | 3196.0               |
|                      |         |                      |                      |         |                      | 3204.3               | 3216.5               | 3231.2               | 3353.6               |
|                      |         |                      |                      |         |                      | 3217.5               | 3246.3               | 3290.5               | 3370.6               |

### III. (Free and hindered) internal rotors, ( $B/\text{cm}^{-1}$ , $V_0/\text{kcal mol}^{-1}$ , Symmetry numbers)

|                                                                      |                             |                                                                      |                        |
|----------------------------------------------------------------------|-----------------------------|----------------------------------------------------------------------|------------------------|
| <sup>a</sup> : $\text{C}_2\text{H}_5\text{O}-\text{C}_2\text{H}_5$ : | Mol/6-31: 4.507 , 5.69 , 1  | <sup>d</sup> : $\text{C}_3\text{H}_6\text{O}-\text{C}_2\text{H}_5$ : | Mol: 3.491 , 5.66 , 1  |
|                                                                      | Dec1/6-31: 4.367 , 3.40 , 1 |                                                                      | Dec1: 3.491 , 3.68 , 1 |
|                                                                      | Mol/6-311: 4.508 , 4.80 , 1 |                                                                      | Dec2: 3.460 , 8.65 , 1 |
|                                                                      | Dec1/6-311 4.372 , 2.48 , 1 |                                                                      |                        |
| <sup>b</sup> : $\text{CH}_2\text{O}-\text{C}_3\text{H}_7$ :          | Mol/6-31: 8.459 , 7.82 , 1  | <sup>e</sup> : $\text{C}_3\text{H}_4\text{O}-\text{C}_3\text{H}_7$ : | Mol: 1.594 , 25.3 , 1  |
|                                                                      | Dec1/6-31: 10.42 , 3.87 , 1 |                                                                      | Dec1 1.876 , 13.0 , 1  |
|                                                                      | Mol/6-311: 8.486 , 7.74 , 1 |                                                                      | Dec2 1.553 , 13.7 , 1  |
|                                                                      | Dec1/6-311 10.38 , 3.89 , 1 |                                                                      |                        |
| <sup>c</sup> : $\text{C}_3\text{H}_6\text{O}-\text{CH}_3$ :          | Mol/6-31: 5.789 , 3.80 , 3  | <sup>f</sup> : $\text{C}_4\text{H}_8\text{O}-\text{CH}_3$ :          | Mol: 5.638 , 3.18 , 3  |
|                                                                      | Dec1/6-31: 5.760 , 3.71 , 3 |                                                                      | Dec1: 5.664 , 2.47 , 3 |
|                                                                      | Mol/6-311: 5.777 , 3.47 , 3 |                                                                      | Dec2: 5.340 , 1.76 , 3 |
|                                                                      | Dec1/6-311 5.746 , 3.52 , 3 |                                                                      | Isom: 5.512 , 3.56 , 3 |
|                                                                      |                             | <sup>g</sup> : $\text{C}_4\text{H}_8\text{O}-\text{CH}_3$ :          | Mol: 5.637 , 3.86 , 3  |
|                                                                      |                             |                                                                      | Dec1: 5.621 , 3.79 , 3 |
|                                                                      |                             |                                                                      | Dec2: 5.626 , 3.79 , 3 |

### IV. Energy ranges

The question of the energy range below the threshold to be considered cannot be answered in general since this depends on the temperature and pressure via the actual population of the reactant ensemble  $n(E)$  as well as the energyspecific rate constants  $k(E)$  which are in addition most sensitive to the shape and the absolute height of the barrier. Nevertheless, we rationalise the calculation of the isomerisation rate coefficient of 1-butoxyl to show its dependence on the energy ranges considered for the final integration  $\langle k(E) \rangle$  at  $T=220$  K and  $p=1.013$  bar. The following integral has been solved for different lower limits.

$$k(p) = \int_0^{\infty} k(E)n(E)dE \quad \text{when} \quad \int_0^{\infty} n(E)dE = 1$$

In practical an upper limit of  $16950 \text{ cm}^{-1}$  has been chosen and is sufficient large to represent +infinity at this temperature.

(Note: For higher temperatures higher upper limits had to be chosen to guarantee convergence of the integral.)

The figure below shows the product of  $k(E) n(E)$  from the actual tunnelling calculation for the isomerisation of 1-butoxyl. The  $n(E)$  has been obtained and normalised from the solution of the master equation at  $T=220$  K and  $p=1.013$  bar and corresponds to the largest eigenvalue. The  $k(E)$  as calculated from RRKM theory via the Eckart tunnelling probabilities are explicitly shown in the insert.

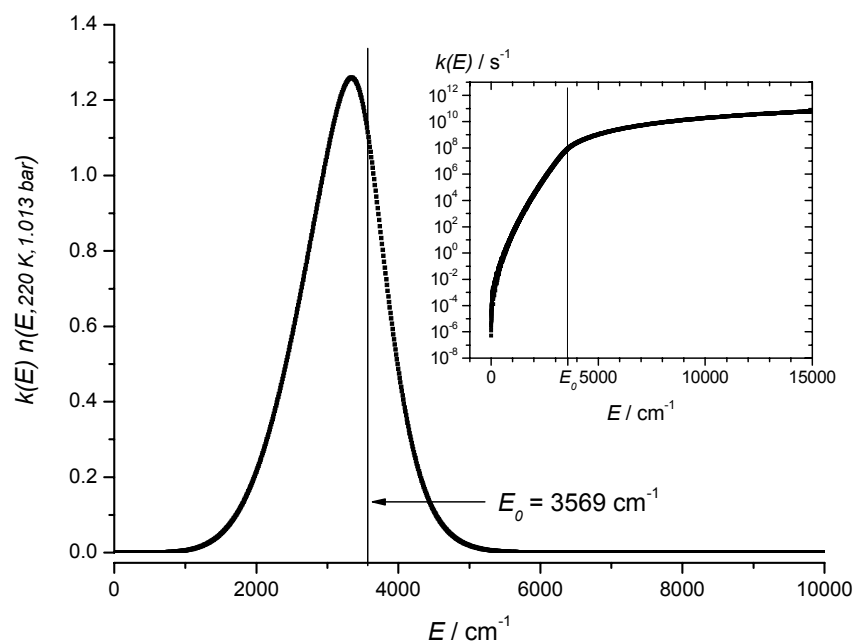

The final rate coefficient  $k(220\text{K}, 1.013 \text{ bar})$  corresponds to the area underneath the  $k(E)n(E)$  product function. Its convergence with respect to the lower limit of integration is shown below:

| Lower limit               | (absolute energy interval)        | Rate coefficient       | Relative deviation |
|---------------------------|-----------------------------------|------------------------|--------------------|
| $E_0 - 10 \text{ kJ/mol}$ | (2733 to 16950 $\text{cm}^{-1}$ ) | 1436.7 $\text{s}^{-1}$ | -22.4%             |
| $E_0 - 15 \text{ kJ/mol}$ | (2315 to 16950 $\text{cm}^{-1}$ ) | 1686.4 $\text{s}^{-1}$ | -8.9%              |
| $E_0 - 20 \text{ kJ/mol}$ | (1897 to 16950 $\text{cm}^{-1}$ ) | 1800.5 $\text{s}^{-1}$ | -2.8%              |
| $E_0 - 25 \text{ kJ/mol}$ | (1479 to 16950 $\text{cm}^{-1}$ ) | 1841.1 $\text{s}^{-1}$ | -0.6%              |
| $E_0 - 30 \text{ kJ/mol}$ | (1061 to 16950 $\text{cm}^{-1}$ ) | 1850.5 $\text{s}^{-1}$ | -0.1%              |
| $E_0 - 35 \text{ kJ/mol}$ | ( 643 to 16950 $\text{cm}^{-1}$ ) | 1851.7 $\text{s}^{-1}$ | -0.0%              |
| Full                      | ( 0 to 16950 $\text{cm}^{-1}$ )   | 1851.8 $\text{s}^{-1}$ | exact              |

It is obvious that a potential function which resembles the true MEP up to 20-25 kJ/mol underneath the barrier can give an accurate representation of tunnelling effects and the corresponding enhanced rate coefficients. Although Eckart barriers often tend to become too small far down from the top, no significant errors would be introduced in this case, since the contributions for the low energies already became negligible (even for an eventually too small barrier).

## V. Kinetic results: Rate expressions

Rate expressions are given in modified Arrhenius form when it is essentially necessary to reproduce the curvature of the calculated rates. (Positive exponents of the  $T^n$  term are due to tunnelling, negative exponents occur in general when away from the high pressure limit). The general accuracy is within a few percent for the temperature ranges given.

Extrapolations outside these limits are not recommended since additional effects must be taken into account such as non-stationary behaviour of the reacting molecule ensemble at higher temperatures which will make the definition of a rate coefficient apart from the theoretical high pressure limit obsolete!! (This is indeed the case as becomes visible by the lowering of the upper temperature limits with decreasing pressure. The ranges imposed guarantee thermal behaviour of all reaction channels.)

**1-butoxyl** (StandardMEP, MP2(full)/6-31G(d) geometries & frequencies, 3 hindered rotors)

->  **$\delta$ -hydroxy-butyl** ( $l=1.74 \text{ amu}^{0.5} \text{ \AA}$ ,  $E_0=42.7 \text{ kJ/mol}$ ):

|                          |                                                                                                          |                                  |
|--------------------------|----------------------------------------------------------------------------------------------------------|----------------------------------|
| p $\rightarrow \infty$ : | $k_{\text{iso}} = 1.196 \cdot 10^{11} (T/300\text{K})^{+1.412} \exp(-3859.0 \text{ K}/T) \text{ s}^{-1}$ | $200 \leq T \leq 1200 \text{ K}$ |
| p = 1013 mbar:           | $k_{\text{iso}} = 1.583 \cdot 10^{12} (T/300\text{K})^{-2.303} \exp(-4679.4 \text{ K}/T) \text{ s}^{-1}$ | $200 \leq T \leq 1100 \text{ K}$ |
| p = 267 mbar:            | $k_{\text{iso}} = 1.016 \cdot 10^{12} (T/300\text{K})^{-2.783} \exp(-4617.8 \text{ K}/T) \text{ s}^{-1}$ | $200 \leq T \leq 1000 \text{ K}$ |

->  **$\text{CH}_2\text{O} + \text{C}_3\text{H}_7$**  ( $E_0=62.8 \text{ kJ/mol}$ ):

|                          |                                                                                                          |                                  |
|--------------------------|----------------------------------------------------------------------------------------------------------|----------------------------------|
| p $\rightarrow \infty$ : | $k_{\text{dec}} = 9.503 \cdot 10^{13} \exp(-8081.4 \text{ K}/T) \text{ s}^{-1}$                          | $200 \leq T \leq 1200 \text{ K}$ |
| p = 1013 mbar:           | $k_{\text{dec}} = 7.926 \cdot 10^{13} (T/300\text{K})^{-4.363} \exp(-8445.5 \text{ K}/T) \text{ s}^{-1}$ | $200 \leq T \leq 1100 \text{ K}$ |
| p = 267 mbar:            | $k_{\text{dec}} = 2.491 \cdot 10^{12} (T/300\text{K})^{-3.611} \exp(-7875.6 \text{ K}/T) \text{ s}^{-1}$ | $200 \leq T \leq 1000 \text{ K}$ |

**2-pentoxyl** (StandardMEP, MP2(full)/6-31G(d) geometries & frequencies, 4 hindered rotors)

->  **$\delta$ -hydroxy-pentyl** ( $l=1.91 \text{ amu}^{0.5} \text{ \AA}$ ,  $E_0=40.2 \text{ kJ/mol}$ ):

|                          |                                                                                                          |                                  |
|--------------------------|----------------------------------------------------------------------------------------------------------|----------------------------------|
| p $\rightarrow \infty$ : | $k_{\text{iso}} = 1.364 \cdot 10^{11} (T/300\text{K})^{+1.518} \exp(-3683.1 \text{ K}/T) \text{ s}^{-1}$ | $200 \leq T \leq 1000 \text{ K}$ |
| p = 1013 mbar:           | $k_{\text{iso}} = 4.650 \cdot 10^{12} (T/300\text{K})^{-3.220} \exp(-4781.6 \text{ K}/T) \text{ s}^{-1}$ | $200 \leq T \leq 1000 \text{ K}$ |
| p = 267 mbar:            | $k_{\text{iso}} = 3.346 \cdot 10^{12} (T/300\text{K})^{-3.713} \exp(-4745.3 \text{ K}/T) \text{ s}^{-1}$ | $200 \leq T \leq 900 \text{ K}$  |

->  **$\text{CH}_3\text{CHO} + \text{C}_3\text{H}_7$**  ( $E_0=50.7 \text{ kJ/mol}$ ):

|                          |                                                                                                           |                                  |
|--------------------------|-----------------------------------------------------------------------------------------------------------|----------------------------------|
| p $\rightarrow \infty$ : | $k_{\text{dec1}} = 9.121 \cdot 10^{13} \exp(-6612.0 \text{ K}/T) \text{ s}^{-1}$                          | $200 \leq T \leq 1000 \text{ K}$ |
| p = 1013 mbar:           | $k_{\text{dec1}} = 7.684 \cdot 10^{14} (T/300\text{K})^{-5.549} \exp(-7474.9 \text{ K}/T) \text{ s}^{-1}$ | $200 \leq T \leq 1000 \text{ K}$ |
| p = 267 mbar:            | $k_{\text{dec1}} = 1.438 \cdot 10^{14} (T/300\text{K})^{-5.694} \exp(-7195.0 \text{ K}/T) \text{ s}^{-1}$ | $200 \leq T \leq 900 \text{ K}$  |

->  **$\text{C}_3\text{H}_7\text{CHO} + \text{CH}_3$**  ( $E_0=61.4 \text{ kJ/mol}$ ):

|                          |                                                                                                           |                                  |
|--------------------------|-----------------------------------------------------------------------------------------------------------|----------------------------------|
| p $\rightarrow \infty$ : | $k_{\text{dec2}} = 8.159 \cdot 10^{13} \exp(-7905.1 \text{ K}/T) \text{ s}^{-1}$                          | $200 \leq T \leq 1000 \text{ K}$ |
| p = 1013 mbar:           | $k_{\text{dec2}} = 2.201 \cdot 10^{14} (T/300\text{K})^{-5.995} \exp(-8615.5 \text{ K}/T) \text{ s}^{-1}$ | $200 \leq T \leq 1000 \text{ K}$ |
| p = 267 mbar:            | $k_{\text{dec2}} = 1.083 \cdot 10^{13} (T/300\text{K})^{-5.493} \exp(-8108.8 \text{ K}/T) \text{ s}^{-1}$ | $200 \leq T \leq 900 \text{ K}$  |

Additional results at arbitrary pressures and temperatures are available on request.
